# Supplementary material for: Evidence and practice in spine registries: A systematic review, and recommendations for future design of registries
Source: PubMed Central journal article supplement — Acta Orthop. 2015 Sep 4;86(5):534–44. doi: 10.3109/17453674.2015.1043174 (PMC4564774; doi:10.3109/17453674.2015.1043174), 2015-09-04
Supplement: ORT-86-534-s8170.pdf [file ORT-86-534-s8170.pdf]

## Supplementary article data

# Evidence and practice in spine registries

## A systematic review, and recommendations for future design of registries

Miranda L VAN HOOFF<sup>1,2</sup>, Wilco C H JACOBS<sup>3</sup>, Paul C WILLEMS<sup>4</sup>, Michel W J M WOUTERS<sup>2,5</sup>,  
Marinus de KLEUVER<sup>1,6</sup>, Wilco C PEUL<sup>3</sup>, Raymond W J G OSTELO<sup>7</sup>, and Peter FRITZELL<sup>8</sup>

---

<sup>1</sup> Sint Maartenskliniek, Nijmegen; <sup>2</sup> Dutch Institute for Clinical Auditing (DICA), Leiden; <sup>3</sup> Leiden University Medical Center, Leiden; <sup>4</sup> Maastricht UMC, Maastricht; <sup>5</sup> NKI-AVL, Amsterdam; <sup>6</sup> VU University Medical Center, Amsterdam; <sup>7</sup> Department of Health Sciences and Department of Epidemiology and Biostatistics, VU University, Amsterdam, the Netherlands; <sup>8</sup> Ryhov Hospital Neuro-Orthopedic Department, Futurum Academy, Jönköping, Sweden.  
Correspondence: m.vanhooff@maartenskliniek.nl  
Submitted 2014-10-17. Accepted 2015-02-15.

**APPENDIX 1: Search strategies****MEDLINE - Pubmed**

("Lumbar vertebrae"[MH] OR  
 "Spine"[mesh] OR  
 "intervertebral disk"[mesh] OR  
 "intervertebral disc"[tiab] OR  
 spine[tiab] OR  
 spinal[tiab] OR  
 vertebra\*[tiab] OR  
 disc[tiab] OR  
 discs[tiab] OR  
 disk[tiab] OR  
 disks[tiab])

AND

("low back pain"[tiab] OR  
 "back pain"[mesh] OR  
 "back pain"[tiab] OR  
 "intermittent neurogenic claudication"[tiab] OR  
 "intermittent claudication"[mesh] OR  
 "intermittent claudication"[tiab] OR  
 "neurogenic claudication"[tiab] OR  
 dorsalgia[tiab] OR  
 backache[tiab] OR  
 lumbago[tiab] OR  
 (lumbar[tiab] AND ("pain"[mesh] OR "pain"[all fields])) OR  
 "sciatica"[mesh] OR  
 "sciatica"[all fields] OR  
 sciatica[tiab] OR  
 "Spondylolisthesis"[mesh] OR  
 "spondylolisthesis"[tiab] OR  
 "isthmic"[tiab] OR  
 "lytic"[tiab] OR  
 "low-grade"[tiab] OR  
 "lumbar stenosis"[ tiab] OR  
 "spinal stenosis"[mesh] OR  
 "spinal stenosis"[TIAB] OR  
 "stenosis" [TIAB] OR  
 "scoliosis"[TIAB] OR  
 "deformity"[ti] OR  
 "Scoliosis"[Mesh] OR  
 "degenerative disc disease"[tiab] OR  
 "spinal diseases"[mesh] OR  
 "intervertebral disk displacement"[mesh] OR  
 "intervertebral disk displacement"[ tiab] OR  
 "discitis"[mesh] OR  
 "discitis"[all fields] OR  
 "spondylosis"[tiab] OR  
 ((disc[tiab] OR discs[tiab] OR disk[tiab] OR disks[tiab]) AND degeneration[tiab]) OR  
 herniated[tiab] OR  
 hernia[tiab] OR  
 "Failed back surgery syndrome" [TIAB] OR  
 "FBSS" [TIAB] OR  
 "myelomeningocele"[TIAB] OR

"Ankylosing spondylitis" [TIAB] OR  
 "tumours" [TIAB] OR  
 "metastases" [TIAB] OR  
 "Trauma" [TIAB] OR  
 "Fracture" [TIAB])

AND

("Clinical Audit"[Mesh] OR  
 "audit"[TIAB] OR  
 "Quality Assurance, Health Care"[Mesh]  
 "Outcome and Process Assessment (Health Care)"[Mesh]  
 "Quality Improvement"[Mesh]  
 "Benchmarking"[Mesh] OR  
 "Benchmarking"[TIAB] OR  
 "Register"[TIAB] OR  
 "Registry"[TIAB] OR  
 "Registries"[Mesh])

**Within Reference manager on all fields (indexed and non-indexed)**

("Outcome and Process Assessment (Health Care)"[Mesh] OR  
 "Quality of Life"[Mesh] OR  
 "Functional status"[TIAB] OR  
 "disability"[tiab] OR  
 "Patient reported outcome" [tiab] OR  
 "PROMS"[tiab])

**APPENDIX 2:****NEWCASTLE - OTTAWA QUALITY ASSESSMENT SCALE for COHORT STUDIES**

*Note:* A study can be awarded a maximum of one star (\*) for each numbered item within the Selection and Outcome categories. A maximum of two stars can be given for Comparability.

**Selection**

- 1) Representativeness of the exposed cohort (dependent on the diagnostic group)
- a) truly representative of the average case in the community \*
  - b) somewhat representative of the average case in the community \*
  - c) selected group of users eg nurses, volunteers
  - d) no description of the derivation of the cohort

## 2) Selection of the non-exposed cohort

- a) drawn from the same community as the exposed cohort \*
- b) drawn from a different source
- c) no description of the derivation of the non-exposed cohort

## 3) Ascertainment of exposure

- a) secure record (eg surgical records) \*
- b) structured interview \*
- c) written self-report
- d) no description

## 4) Demonstration that outcome of interest was not present at start of study

- a) yes \*
- b) no

**Comparability**

## 5) Comparability of cohorts on the basis of the design or analysis

- a) study controls for the most relevant case mix variables (1. Diagnosis and 2. Baseline outcome score) \*
- b) study controls for any additional factor \*

**Outcome**

## 6) Assessment of outcome

- a) independent blind assessment \*
- b) record linkage \*
- c) self-report
- d) no description

## 7) Was follow-up long enough for outcomes to occur

- a) yes (select an adequate follow up period for outcome of interest) \*
- b) no

## 8) Adequacy of follow up of cohorts

- a) complete follow up - all subjects accounted for \*
- b) subjects lost to follow up unlikely to introduce bias - small number lost → 20%; 80% response \*
- c) follow up rate < 80% (select an adequate %) and no description of those lost
- d) no statement

|                              |  |
|------------------------------|--|
| <b>Total score</b> (n stars) |  |
|------------------------------|--|

APPENDIX 3: Table 1. Study characteristics

| Author, year reference | Name Registry                                                     | Study purpose                                              | Indication             | Outcomes <sup>1</sup>                                                                                                                                                   | Covariate adjustment                                                                                      | Statistics                                                                                                                                                                                                                                                        |
|------------------------|-------------------------------------------------------------------|------------------------------------------------------------|------------------------|-------------------------------------------------------------------------------------------------------------------------------------------------------------------------|-----------------------------------------------------------------------------------------------------------|-------------------------------------------------------------------------------------------------------------------------------------------------------------------------------------------------------------------------------------------------------------------|
| Nerland et al., 2014   | NORspine<br>Norwegian Registry<br>for Spine Surgery<br><br>Norway | To study the equivalence of changes in functional outcomes | Lumbar spinal stenosis | PROM:<br>ODI v.2.0<br><br>Secondary PROMs:<br>EQ5D<br>Clinical:<br>perioperative complications<br>duration of surgical procedures<br>length of hospital stay            | Adjustment for:<br>Numbers of levels operated (one or two)<br>Age<br>BMI<br>Baseline ODI value            | Descriptive statistics<br>Mixed linear models<br><br>Methods Missing data:<br>Complete cases analysis                                                                                                                                                             |
| Solberg et al., 2013   | NORspine<br>Norwegian Registry<br>for Spine Surgery<br><br>Norway | To estimate cut off values for success                     | Lumbar disc herniation | PROMs:<br>ODI v.1<br>NPRS (0-10) Back pain intensity<br>NPRS (0-10) Leg pain intensity<br>EQ5D<br><br>Secondary PROM:<br>Global perceived effect (7-point Likert scale) | Adjustment for baseline scores:<br>ODI v.1<br>NPRS Back pain intensity<br>NPRS Leg pain intensity<br>EQ5D | Descriptive statistics<br>Treatment effect: Paired Students t-tests<br>Subgroup comparison: one-way ANOVA<br>Relationship Global Perceived change and change scores: Spearman rank correlation coefficient<br>Cut off values for success:<br>ROC analyses and AUC |

|                         |                                                                                                           |                                                                                                                                                                                                                                |                                                                                |                                                                                                                                                                                        |                                                                                                                                                                                                                                                                                                                                                |                                                                                                                                                                                                                                                         |
|-------------------------|-----------------------------------------------------------------------------------------------------------|--------------------------------------------------------------------------------------------------------------------------------------------------------------------------------------------------------------------------------|--------------------------------------------------------------------------------|----------------------------------------------------------------------------------------------------------------------------------------------------------------------------------------|------------------------------------------------------------------------------------------------------------------------------------------------------------------------------------------------------------------------------------------------------------------------------------------------------------------------------------------------|---------------------------------------------------------------------------------------------------------------------------------------------------------------------------------------------------------------------------------------------------------|
| Corcoll et al.,<br>2006 | NRT en el SNS<br>Registry within<br>Spanish National<br>Health Service<br><br>Spain - Balearic<br>Islands | To describe the<br>implementation of<br>Neuroreflexotherapy and<br>the audit results                                                                                                                                           | Non-specific<br>subacute and<br>chronic neck, back,<br>and low back pain.      | Rates of referral and<br>appropriate referral<br>Patient satisfaction<br>Physician satisfaction<br><br>Secondary<br>PROMs:<br>VAS pain intensity of<br>local and referred pain<br>RMDQ | Not reported                                                                                                                                                                                                                                                                                                                                   | Descriptive statistics                                                                                                                                                                                                                                  |
| Kovacs et al.,<br>2012  | NRT en el SNS<br>Registry within<br>Spanish National<br>Health Service<br><br>Spain                       | To explore the feasibility<br>of implementing a<br>registry in routine<br>practice.<br>To develop predictive<br>models to quantify the<br>likelihood that a given<br>patient experiences a<br>clinical relevant<br>improvement | Acute and chronic<br>Low Back Pain with<br>or without leg pain<br>Seeking care | PROMs:<br>RMDQ<br>VAS (10cm) Back pain<br>intensity<br>VAS (10cm) Leg pain<br>intensity                                                                                                | Independent variables in model:<br>Gender<br>Age<br>Duration of current pain episode<br>(acute, subacute, chronic)<br>Employment status<br>Education<br>Recruitment setting<br>Previous back surgery<br>Current episode because of Failed<br>Back Surgery Syndrome<br>Diagnostic procedures/tests current<br>episode<br>Concomitant treatments | Descriptive statistics<br>Improvement based on<br>Minimal Clinical Important<br>Change<br>Multivariate logistic<br>regression models using<br>backward strategy<br><br>Methods Missing data:<br>Multiple imputation analysis<br>(n= 5 imputed datasets) |
| Kovacs et al.,<br>2007  | NRT en el SNS<br>Registry within<br>Spanish National<br>Health Service<br><br>Spain - Balearic<br>Islands | To identify prognostic<br>factors for clinical<br>outcome.                                                                                                                                                                     | Non-specific<br>subacute and<br>chronic neck, back,<br>and low back pain.      | PROMs:<br>RMDQ<br>VAS (10cm) local pain<br>intensity<br>VAS (10cm) referred<br>pain intensity                                                                                          | Independent variables in model:<br>Reason for referral (neck, back)<br>Gender<br>Age<br>Baseline PROMs<br>Number of days with implanted<br>surgical staples<br>Duration of current pain episode<br>(classified)<br>Duration since first diagnosis<br>(classified)<br>Failed previous surgery for current                                       | Descriptive statistics<br>Multivariate logistic<br>regression models using<br>backward strategy                                                                                                                                                         |

|                                  |                                                                                     |                                                                                                                                           |                                                                         |                                                                                                                                                                  |                                                                                                                                                                                                                                                                                                                                                                                                                                                                                                                                                                                             |                                                                                                                                                                                                                                                                                                                     |
|----------------------------------|-------------------------------------------------------------------------------------|-------------------------------------------------------------------------------------------------------------------------------------------|-------------------------------------------------------------------------|------------------------------------------------------------------------------------------------------------------------------------------------------------------|---------------------------------------------------------------------------------------------------------------------------------------------------------------------------------------------------------------------------------------------------------------------------------------------------------------------------------------------------------------------------------------------------------------------------------------------------------------------------------------------------------------------------------------------------------------------------------------------|---------------------------------------------------------------------------------------------------------------------------------------------------------------------------------------------------------------------------------------------------------------------------------------------------------------------|
| <p>Royuela et al.,<br/>2013</p>  | <p>NRT en el SNS Registry within Spanish National Health Service<br/><br/>Spain</p> | <p>To assess the feasibility of using a registry in routine practice.<br/>To develop models predicting the probability of improvement</p> | <p>Non-specific subacute and chronic neck, back, and low back pain.</p> | <p>PROMs:<br/>RMDQ for LBP / NDI for neck pain<br/>VAS (10cm) local pain intensity<br/>VAS (10cm) referred pain intensity</p>                                    | <p>episode<br/>Independent vars in model:<br/>Reason for referral (neck, back LBP)<br/>Gender<br/>Age<br/>Baseline PROMs<br/>Number of days with implanted surgical staples<br/>Duration of current pain episode (classified)<br/>Duration since first diagnosis (classified)<br/>Employment status<br/>Type of pain<br/>Diagnosis of fibromyalgia<br/>Other comorbidities<br/>Involvement in employment claims<br/>Involvement in litigation<br/>Diagnostic tests before NRT<br/>Neuroreflexotherapy (NRT)<br/>Imaging findings<br/>History of spine surgery<br/>Treatments before NRT</p> | <p>Descriptive statistics<br/>Improvement based on Minimal Clinical Important Change<br/>Multivariate logistic regression models<br/>Nomograms to illustrate results of models<br/><br/>Methods Missing data:<br/>Multiple imputation analysis (n= 10 imputed datasets)</p>                                         |
| <p>Fritzell et al.,<br/>2014</p> | <p>SweSpine Swedish National Spine Register<br/><br/>Sweden</p>                     | <p>To compare PROMs between primary LDH and recurrent LDH.<br/>To determine risk factors for worse outcomes.</p>                          | <p>Lumbar disc herniation</p>                                           | <p>PROMs:<br/>VAS (10cm) leg pain intensity<br/>VAS (10cm) back pain intensity<br/>ODI<br/>EQ5D<br/>Satisfaction and Global assessment of change in leg pain</p> | <p>Adjustments for:<br/>Age<br/>Gender<br/>Smoking<br/><br/>Baseline value of analysed PROM</p>                                                                                                                                                                                                                                                                                                                                                                                                                                                                                             | <p>Descriptive statistics<br/>Comparison baseline characteristics between groups: independent Students' t-test continuous variables, Chi-square test ordinal data.<br/>In outcome calculation ANCOVA was used.<br/>Multivariate logistic regression analysis<br/>Descriptive statistics<br/>Adjusted means were</p> |
| <p>Forstth et al.,<br/>2013</p>  | <p>SweSpine Swedish National</p>                                                    | <p>To compare satisfaction after decompression</p>                                                                                        | <p>Lumbar spinal stenosis in one or</p>                                 | <p>PROMs:<br/>VAS (10cm) leg pain</p>                                                                                                                            | <p>Adjustments for:<br/>Age (continuous)</p>                                                                                                                                                                                                                                                                                                                                                                                                                                                                                                                                                | <p>Descriptive statistics<br/>Adjusted means were</p>                                                                                                                                                                                                                                                               |

|                          |                                                       |                                                                                                                                        |                                                                                 |                                                                                                                     |                                                                                                                                                                                                                                                                   |                                                                                                                |
|--------------------------|-------------------------------------------------------|----------------------------------------------------------------------------------------------------------------------------------------|---------------------------------------------------------------------------------|---------------------------------------------------------------------------------------------------------------------|-------------------------------------------------------------------------------------------------------------------------------------------------------------------------------------------------------------------------------------------------------------------|----------------------------------------------------------------------------------------------------------------|
|                          | Spine Register<br>Sweden                              | alone and following decompression and fusion.                                                                                          | two levels, with and without pre-operative spondylolisthesis<br>Age: ≥ 50 years | intensity VAS (10cm) back pain intensity<br>ODI<br>EQ5D<br>Satisfaction and Global assessment of change in leg pain | Gender<br>Smoking<br>Duration of symptoms<br>Previous spinal surgery<br>Baseline analgesic use<br><br>Baseline value of analysed PROM<br><br>A frailty component was included to handle within-hospitals dependencies in patient selection and surgical technique | estimated using Students' <i>t</i> -tests.<br>Multivariate logistic regression analyses                        |
| Jansson et al.,<br>2005  | SweSpine<br>Swedish National Spine Register<br>Sweden | To report the health-related quality of life outcome in Lumbar Disc herniation.<br>To compare the results with the Swedish population. | Lumbar disc herniation                                                          | PROM:<br>EQ5D                                                                                                       | Covariates:<br>Age<br>Gender<br>Smoking status<br>Type of surgery<br>Duration of back and leg pain<br>PROM: baseline VAS leg pain<br>Pre-operative walking distance<br>PROM: baseline EQ5D                                                                        | Descriptive statistics<br>MANOVA, adjusted for covariates.                                                     |
| Jansson et al.,<br>2009  | SweSpine<br>Swedish National Spine Register<br>Sweden | To report HRQoL outcome in an Lumbar Spinal Stenosis cohort<br>To compare the findings with the Swedish population.                    | Lumbar spinal stenosis                                                          | PROM<br>EQ5D score and EQ-VAS                                                                                       | Covariates:<br>Age<br>Gender<br>Smoking status<br>Type of surgery<br>Duration of back and leg pain<br>Pre-operative walking distance<br>PROM: baseline EQ5D                                                                                                       | Descriptive statistics<br>MANOVA, adjusted for covariates.                                                     |
| Knutsson et al.,<br>2013 | SweSpine<br>Swedish National Spine Register<br>Sweden | To determine the association between BMI and outcome of lumbar spine surgery.                                                          | Lumbar spinal stenosis                                                          | PROMs:<br>VAS (10cm) leg pain intensity<br>VAS (10cm) back pain intensity<br>ODI<br>EQ5D                            | Adjustment for:<br>Age<br>Gender<br>Smoking<br>Use of analgesics<br>Previous back surgery<br>Duration of symptoms                                                                                                                                                 | Descriptive statistics<br>General linear models (GLM).<br>Restricted cubic-spline logistic regression analysis |

|                                 |                                                                         |                                                                                                  |                                  |                                                                                                                                                                                       |                                                                                                                                                                                                                                                                                                                                                   |                                                                                                                                                                        |
|---------------------------------|-------------------------------------------------------------------------|--------------------------------------------------------------------------------------------------|----------------------------------|---------------------------------------------------------------------------------------------------------------------------------------------------------------------------------------|---------------------------------------------------------------------------------------------------------------------------------------------------------------------------------------------------------------------------------------------------------------------------------------------------------------------------------------------------|------------------------------------------------------------------------------------------------------------------------------------------------------------------------|
| <p>Robinson et al., 2013</p>    | <p>SweSpine<br/>Swedish National<br/>Spine Register<br/><br/>Sweden</p> | <p>To compare the 2-year results of 3 methods of lumbar fusion (UIF, IPF, and TLIF/PLIF).</p>    | <p>Degenerative disc disease</p> | <p>Satisfaction 3-point Likert scale<br/>Clinical outcome: Height &amp; weight (BMI)<br/>PROMs: VAS (10cm) leg pain intensity<br/>VAS (10cm) back pain intensity<br/>ODI<br/>EQ5D</p> | <p>PROMs: Baseline values<br/><br/>Adjustment for:<br/>Age<br/>Gender<br/>Smoking<br/>Use of analgesics<br/>Previous back surgery<br/>Duration of symptoms<br/>PROMs: Baseline value under study<br/><br/>Year of surgery: as 2 of the methods were unevenly distributed over study period. In many hospitals 1 surgical method predominated.</p> | <p>Descriptive statistics<br/>PROC MIXED and Kenward-means<br/>Modified Poisson regression approach</p>                                                                |
| <p>Sanden et al., 2011</p>      | <p>SweSpine<br/>Swedish National<br/>Spine Register<br/><br/>Sweden</p> | <p>To determine the relation between smoking status and disability after surgical treatment.</p> | <p>Lumbar spinal stenosis</p>    | <p>PROMs: VAS (10cm) leg pain intensity<br/>VAS (10cm) back pain intensity<br/>ODI<br/>Walking distance (categorized)<br/>SF36<br/>EQ5D</p>                                           | <p>Adjustment for:<br/>Age<br/>Gender<br/>Smoking<br/>Use of analgesics<br/>PROMs: Baseline value under study</p>                                                                                                                                                                                                                                 | <p>Descriptive statistics<br/>General Linear Models (GLM), adjusted means<br/>Multivariate logistic regression</p>                                                     |
| <p>Sigmundsson et al., 2012</p> | <p>SweSpine<br/>Swedish National<br/>Spine Register<br/><br/>Sweden</p> | <p>To determine predictive factors of surgical outcome.</p>                                      | <p>Lumbar spinal stenosis</p>    | <p>PROMs: VAS (10cm) leg pain intensity<br/>VAS (10cm) back pain intensity<br/>ODI<br/>Walking distance (categorized)<br/>EQ5D</p>                                                    | <p>Controlled for:<br/>Age<br/>Duration of back and leg pain<br/>MRI: Multilevel stenosis and spondylolisthesis<br/>MRI: Central dural sac area ?<br/>PROMs: baseline values Walking distance, Back and Leg pain</p>                                                                                                                              | <p>Descriptive statistics<br/>Paired Students' t-test;<br/>Mann Whitney U, Kruskal Wallis)<br/>Multivariate regression analysis<br/>MANOVA for variation in PROMs.</p> |



|                          |                                                    |                                                                                                                                     |                        |                                                                                                                                                                                     |                                                                                                                                                                               |                                                                                                                                                                                                             |
|--------------------------|----------------------------------------------------|-------------------------------------------------------------------------------------------------------------------------------------|------------------------|-------------------------------------------------------------------------------------------------------------------------------------------------------------------------------------|-------------------------------------------------------------------------------------------------------------------------------------------------------------------------------|-------------------------------------------------------------------------------------------------------------------------------------------------------------------------------------------------------------|
| Sigmundsson et al., 2013 | SweSpine Swedish National Spine Register<br>Sweden | To determine how different constellations of back and leg pain influence preoperative health related quality of life.               | Lumbar spinal stenosis | PROMs:<br>VAS (10cm) leg pain intensity<br>VAS (10cm) back pain intensity<br>ODI<br>Walking distance (categorized)<br>SF36<br>EQ5D                                                  | Not reported                                                                                                                                                                  | Descriptive statistics<br>Parametric tests:<br>Satterthwait t-tes<br>Non-parametric tests:<br>Mann-Whitney test, test for trend (Chi-square)                                                                |
| Sigmundsson et al., 2014 | SweSpine Swedish National Spine Register<br>Sweden | To evaluate outcome of surgery and to explore the role of spinal fusion in predominant back pain and predominant leg pain.          | Lumbar spinal stenosis | PROMs:<br>VAS (10cm) leg pain intensity<br>VAS (10cm) back pain intensity<br>ODI<br>Walking distance (categorized)<br>SF36<br>EQ5D<br><br>Satisfaction with operation (categorized) | Adjustments for:<br>Age<br>Gender<br>Duration of Leg and Back Pain<br>Comorbidity<br>Smoking<br><br>Baseline PROM score                                                       | Descriptive statistics<br>Linear regression analysis.<br>Cox proportional hazard model (Robust)<br>Outcomes compared with unadjusted nonparametric tests, test for trend (Chi square), Mann Whitney U test. |
| Stromqvist et al., 2012  | SweSpine Swedish National Spine Register<br>Sweden | To elucidate the incidence of dural lesions in decompressive surgery, to identify risk factors and effect on postoperative outcome. | Lumbar spinal stenosis | Clinical:<br>Dural lesion<br><br>PROMs:<br>VAS (10cm) leg pain intensity<br>VAS (10cm) back pain intensity<br>ODI<br>SF36<br>EQ5D<br><br>Satisfaction with operation (categorized)  | Risk factors:<br>Age<br>Gender<br>Smoking<br>Work<br>Consumption of analgesics<br>Walking distance<br>Clinical risk factors:<br>Dural lesion<br>Number of levels decompressed | Descriptive statistics<br>Logistic regression analysis                                                                                                                                                      |

|                               |                                                                 |                                                                                                     |                                                                                 |                                                                                                                                                                                                                                                                                                                                                       |                     |                                                                                                                                                       |
|-------------------------------|-----------------------------------------------------------------|-----------------------------------------------------------------------------------------------------|---------------------------------------------------------------------------------|-------------------------------------------------------------------------------------------------------------------------------------------------------------------------------------------------------------------------------------------------------------------------------------------------------------------------------------------------------|---------------------|-------------------------------------------------------------------------------------------------------------------------------------------------------|
| <p>Berg et al, 2010</p>       | <p>SweSpine Swedish National Spine Register<br/><br/>Sweden</p> | <p>To determine whether a registry can provide the same information as an RCT.</p>                  | <p>CLBP - Degenerative disc disease</p>                                         | <p>Global rating scale for improvement of back and leg pain<br/><br/>Secondary PROMs:<br/>VAS (10cm) leg pain intensity<br/>VAS (10cm) back pain intensity<br/>ODI<br/>Walking distance (categorized)<br/>SF36<br/>EQ5D<br/><br/>Satisfaction with operation (categorized)<br/><br/>Complications<br/>Reoperations<br/>Work status<br/>Medication</p> | <p>Not reported</p> | <p>Descriptive statistics<br/>Two-tailed Mann-Whitney U; Wilcoxon rank sum tests<br/>Students' t test; Spearman r, Fisher exact; Chi-square tests</p> |
| <p>Grob and Mannion, 2009</p> | <p>SSE Spine Tango Surgery Registry<br/><br/>Switzerland</p>    | <p>To investigate the occurrence of post-surgical complications from the patient's perspective.</p> | <p>Spine surgery for different pathologies of the cervical and lumbar spine</p> | <p>PROM:<br/>COMI<br/>Occurrence / nature of postop complications<br/><br/>Secondary PROMs:<br/>Satisfaction intervention (5-point Likert scale)<br/>Global perceived effect (5-point Likert scale)<br/>Patient-rated complications (dichotomous)</p>                                                                                                 | <p>Not reported</p> | <p>Descriptive statistics<br/>To evaluate group differences: Chi-square tests for proportion differences</p>                                          |

|                        |                                                                                                 |                                                                                                                                                                    |                                             |                                                                                                                                                                                                                                                                          |                                                                                                                                                                     |                                                                                                                                   |
|------------------------|-------------------------------------------------------------------------------------------------|--------------------------------------------------------------------------------------------------------------------------------------------------------------------|---------------------------------------------|--------------------------------------------------------------------------------------------------------------------------------------------------------------------------------------------------------------------------------------------------------------------------|---------------------------------------------------------------------------------------------------------------------------------------------------------------------|-----------------------------------------------------------------------------------------------------------------------------------|
| Porchet et al.<br>2009 | SSE<br>Spine Tango<br>Surgery Registry<br><br>Switzerland                                       | To compare outcome after lumbar disc excision with and without the use of the microscope.                                                                          | Lumbar / lumbosacral degenerative disorders | PROM:<br>COMI, incl.<br>- NPRS (0-10) Back pain intensity<br>- NPRS (0-10) Leg pain intensity<br><br>Secondary PROMs:<br>Satisfaction intervention (5-point Likert scale)<br>Global perceived effect (5-point Likert scale)<br>Patient-rated complications (dichotomous) | Gender<br>Age categories (<60; >60)<br>Health insurance (Private; Basic obligatory)<br>Comorbidity (ASA score)<br><br>Baseline PROM score (COMI, NPRS back and leg) | Descriptive statistics<br>Unpaired Students t tests<br>Contingency analyses (Chi-square tests)                                    |
| Aghayev et al.<br>2012 | SSE<br>Spine Tango<br>Surgery Registry<br>SWISSpine<br>SWISSpine<br>Registry<br><br>Switzerland | To compare back and leg pain alleviation after total disc arthroplasty and ALIF stratified by implant and surgeon from the SWISS-spine and Spine Tango registries. | CLBP - Degenerative disc disease            | PROM:<br>NASS, used<br>- VAS (10 cm) Back pain intensity<br>- VAS (10 cm) Leg pain intensity<br>EQ5D                                                                                                                                                                     | Covariates:<br>Implant<br>Surgeon<br>Depression<br>Age<br>Gender<br>Follow-up interval<br>Length of stay (LoS)<br><br>Baseline PROM score                           | Descriptive statistics<br>First step: univariate logistic regression<br>Second step: generalized linear model (GLM), adjusted     |
| Aghayev et al.<br>2010 | SWISSpine<br>SWISSpine<br>Registry<br><br>Switzerland                                           | To evaluate the outcomes of all single-level Dynardi TDAs compared with all other prostheses in the SWISSspine data pool.                                          | CLBP - Degenerative disc disease            | PROM:<br>NASS, used<br>- VAS (10 cm) Back pain intensity<br>- VAS (10 cm) Leg pain intensity<br>EQ5D                                                                                                                                                                     | Covariates:<br>Device used<br>Gender<br>Age (categorized)<br>Surgical volume of center of intervention<br>Pharmacologically treated depression                      | Descriptive statistics<br>Wilcoxon rank-sum test<br>Chi-square tests<br>Multiple logistic regression models; backward elimination |

|                         |                                                                               |                                                                                                                                                                                                  |                                                                                                                                                                              |                                                                                                                                                                                                                |                                                                                                                                                                                                                                                    |                                                                                                                                                           |
|-------------------------|-------------------------------------------------------------------------------|--------------------------------------------------------------------------------------------------------------------------------------------------------------------------------------------------|------------------------------------------------------------------------------------------------------------------------------------------------------------------------------|----------------------------------------------------------------------------------------------------------------------------------------------------------------------------------------------------------------|----------------------------------------------------------------------------------------------------------------------------------------------------------------------------------------------------------------------------------------------------|-----------------------------------------------------------------------------------------------------------------------------------------------------------|
| Schlussmann et al. 2009 | SWISSpine Registry                                                            | To report the methodology and implementation of the SWISSpine registry and early results of the cases with TDA.                                                                                  | Not reported<br>Lumbar Total Disc Arthroplasty (TDA)                                                                                                                         | PROM:<br>NAASS, used<br>- VAS (10 cm) Back pain intensity<br>- VAS (10 cm) Leg pain intensity<br>EQ5D                                                                                                          | Preoperative PROM scores (pain and EQ5D; categorized)<br>Covariates:<br>Prosthesis used<br>Gender<br>Age<br>Surgical volume of center of intervention (categorized)<br>Pharmacologically treated depression                                        | Descriptive statistics<br>Wilcoxon rank-sum test<br>Chi-square test<br>Multiple logistic regression models, backward elimination                          |
| Zweig et al. 2011       | SWISSpine Registry<br>Switzerland                                             | To prove that preoperative nucleus pulposus status and presence or absence of radiculopathy has an influence on clinical outcomes in patients with mono-segmental lumbar total disc replacement. | Not reported<br>mono-segmental TDR surgery for Degenerative disc disease<br>Hernia nucleus pulposus - no radiculopathy, Stenosis, Hernia nucleus pulposus - radiculopathy    | PROM:<br>NAASS, used<br>- VAS (10 cm) Back pain intensity<br>- VAS (10 cm) Leg pain intensity<br>EQ5D                                                                                                          | Preoperative PROM scores (pain and EQ5D)<br>Adjustement for covariates:<br>Gender<br>Age<br>Preoperative pain medication<br>Intervertebral level of intervention<br>Pharmacologically treated depression<br>Type of work<br>Working activity level | Descriptive statistics<br>Univariate logistic regression or ANOVA<br>General linear modelling (GLM).<br>Bonferroni-Holm adjustments for multiple testing. |
| McGirt et al. 2013      | N <sup>2</sup> QOD National Neurosurgery Quality and Outcomes Database<br>USA | To provide an overview of the aims, registry design and methods of the N2QOD pilot year lumbar module.                                                                                           | Lumbar spinal disorders:<br>- symptomatic lumbar disc herniation<br>- symptomatic recurrent lumbar disc herniation<br>- lumbar stenosis<br>- lumbar adjacent segment disease | Perioperative measures:<br>Blood loss<br>Length of Stay<br>Need for inpatient rehabilitation or skilled nursing<br>90-day morbidity readmission reoperation<br>Occupational outcome (return to work, capacity) | Patient characteristics and demographic factors for risk-adjustment                                                                                                                                                                                | Descriptive statistics<br>Risk-adjusted models<br>Complete cases analyses                                                                                 |

|                    |                                                                 |                                                                                                                                                           |                                                                                                                                        |                                                                                                                                                                                                                                                                                                   |                                                                                                                                                                                                                                                                              |                                                                                                                                                                                          |
|--------------------|-----------------------------------------------------------------|-----------------------------------------------------------------------------------------------------------------------------------------------------------|----------------------------------------------------------------------------------------------------------------------------------------|---------------------------------------------------------------------------------------------------------------------------------------------------------------------------------------------------------------------------------------------------------------------------------------------------|------------------------------------------------------------------------------------------------------------------------------------------------------------------------------------------------------------------------------------------------------------------------------|------------------------------------------------------------------------------------------------------------------------------------------------------------------------------------------|
| Deer et al. 2004   | National Outcomes Registry for LBP<br><br>USA                   | To obtain data on patient demographics, clinical practices, and long-term outcomes for patients with CLBP treated with implantable drug-delivery systems. | CLBP - intrathecal Drug Delivery (IDD)                                                                                                 | <p>PROMs:<br/>Patient satisfaction<br/>NPRS (1-10) back and leg pain<br/>ODI<br/>EQ5D</p> <p>PROMs:<br/>NPRS (0-10) back and leg pain<br/>ODI v1.0<br/>Secondary<br/>Return to work<br/>Satisfaction (with IDD, recommend IDD to others, and quality of life)<br/>Adverse events</p>              | Patient characteristics: age, gender, underlying cause of pain, type of pain, previous pain treatments, use of systemic opioids, work status, trialling site, trial duration, type of medical insurer, previous psychological evaluations, implant location, type of system. | Descriptive statistics.<br>Chi-square tests and Paired t-tests treatment effect.<br>Repeated measures ANOVA outcomes over time .                                                         |
| Taylor et al. 2000 | Community outcomes management study<br><br>USA; community-based | To examine factors associated with favourable self-reported outcomes 1 year after elective surgery.                                                       | Lumbar spinal disorders:<br>- degenerative changes<br>- herniated disc<br>- instability (incl. Spondylolisthesis)<br>- spinal stenosis | <p>Patient-reported questions:<br/>- back surgery changed quality of life<br/>- functioning better/worse than before surgery<br/>- rate of overall treatment of back problem<br/>- bothersomeness back pain<br/>- bothersomeness leg pain<br/>- interference of physical health in activities</p> | Age<br>Gender<br>Smoking habits<br>Duration of symptoms<br>Clinical signs<br>Diagnosis<br>Surgical procedure<br>Previous surgery<br>Work status<br>Workers' compensation<br>Seeing attorney<br><br>Baseline scores on patient-reported questions                             | Descriptive statistics<br>Chi-square test, Fisher exact test differences characteristics<br>Unconditional logistic regression techniques used<br>Multivariate logistic regression models |

|                      |                                       |                                                                                                                                                                                                                                     |                 |                                                                                                                                           |                                                                                                                                                                                            |                                                                                                                                       |
|----------------------|---------------------------------------|-------------------------------------------------------------------------------------------------------------------------------------------------------------------------------------------------------------------------------------|-----------------|-------------------------------------------------------------------------------------------------------------------------------------------|--------------------------------------------------------------------------------------------------------------------------------------------------------------------------------------------|---------------------------------------------------------------------------------------------------------------------------------------|
| Bridwell et al. 2007 | Adult Deformity Outcomes Database USA | To prospectively analyse the responsiveness of the SRS-22 to change 1 and 2-years following primary surgery.                                                                                                                        | Adult deformity | - most strenuous level of physical activity<br>PROMs:<br>SRS-22<br>ODI<br>SF12                                                            | Age (categorized)<br>Curve type (major curve location)                                                                                                                                     | Descriptive statistics                                                                                                                |
| Glassman et al. 2009 | Adult Deformity Outcomes Database USA | To examine outcomes after adult deformity surgery. Do 1-year outcomes predict 2-year outcomes?                                                                                                                                      | Adult deformity | PROMs:<br>SRS-22<br>ODI<br>NPRS (0-10) for back and leg pain<br>SF12 (physical and mental component scores)                               | Subgroup analyses based on:<br>Diagnosis<br>Curve type                                                                                                                                     | Descriptive statistics<br>Matched-pairs sample t-test statistics and post-hoc ANOVA for treatment effect and differences in subgroups |
| Glassman et al. 2007 | Adult Deformity Outcomes Database USA | To determine whether perioperative complications alter clinical outcomes.                                                                                                                                                           | Adult deformity | Clinical:<br>Complications<br>PROMs:<br>SRS-22<br>ODI<br>NPRS (0-10) for back and leg pain<br>SF12 (physical and mental component scores) | Three defined complication cohorts were matched:<br>Age (categorized)<br>Diagnosis<br>Baseline PROM SRS-22 total score<br>Distal fusion level<br>Sagittal balance at 1-year post-operation | Descriptive statistics<br>Propensity modelling.<br>Analysis: 1-way and repeated measures ANOVA.                                       |
| Kasliwal et al. 2012 | Adult Deformity Outcomes Database USA | To assess differences in surgical parameters (e.g. Surgical time, blood loss), complication rates, and outcomes in adults undergoing spinal deformity correction who either did or did not have a history of a short-segment spinal | Adult deformity | PROMs:<br>SRS-22<br>ODI v1<br>NPRS (0-10) for back and leg pain<br>SF12 (physical and mental component scores)<br>Clinical:               | Patients with/without prior surgery were matched:<br>Age (categorized)<br>Baseline PROM ODI score<br>Cobb angle<br>Sagittal Vertical Axis (SVA)                                            | Descriptive statistics<br>Propensity modelling<br>Wilcoxon signed-rank or Fisher exact tests used to compare outcomes.                |

|                       |                                                               | procedure.                                                                                                                                                                                    |                                                                                                                                  | Complications                                                                                                                                                |                                                                                                                                                                                     |                                                                                                                                                                                                                                                                                                                                                                                                                                                  |  |
|-----------------------|---------------------------------------------------------------|-----------------------------------------------------------------------------------------------------------------------------------------------------------------------------------------------|----------------------------------------------------------------------------------------------------------------------------------|--------------------------------------------------------------------------------------------------------------------------------------------------------------|-------------------------------------------------------------------------------------------------------------------------------------------------------------------------------------|--------------------------------------------------------------------------------------------------------------------------------------------------------------------------------------------------------------------------------------------------------------------------------------------------------------------------------------------------------------------------------------------------------------------------------------------------|--|
| Schwab et al.<br>2008 | Adult Deformity Outcomes Database<br>USA                      | To determine if models for predicting outcome and complications can be constructed.                                                                                                           | Adult deformity                                                                                                                  | <p>PROMs:<br/>SRS-22<br/>ODI v1<br/>NPRS (0-10) for back and leg pain<br/>SF12 (physical and mental component scores)</p> <p>Clinical:<br/>Complications</p> | <p>Diagnosis<br/>Classification type (type and modifiers)<br/>Surgical procedure<br/>Age<br/>Gender<br/>BMI<br/>Previous surgery (revision state)<br/><br/>Baseline PROM scores</p> | <p>Descriptive statistics<br/>Two approaches were used to determine factors predicting successful surgical outcome:<br/>1. Binary logistic regression models were built to examine how factors combine and interact.<br/>2. Multiple linear regression analyses using backward and stepwise techniques were used to eliminate redundant predictive factors.<br/>Subsequently, binary logistic regression to predict a reported complication.</p> |  |
| Adogwa et al.<br>2013 | Multicenter registry for lumbar spine surgery<br>USA & Canada | To assess the effect of incidental durotomies on the immediate postoperative complications.<br>To investigate the patient-reported outcomes at longer-term follow up following lumbar fusion. | <p>Lumbar spinal disorders:<br/>- Degenerative disc disease<br/>- Grade spondylolisthesis with central of foraminal stenosis</p> | <p>PROMs:<br/>VAS Back pain<br/>VAS Leg pain<br/>ODI<br/><br/>Clinical:<br/>Postoperative complications</p>                                                  | <p>Patients with durotomy and controls were matched using propensity modelling (1:2) based on:<br/>Age<br/>Gender<br/>Comorbidities<br/>Other relevant surgical factors</p>         | <p>Descriptive statistics<br/>Student <i>t</i>-test, Mann-Whitney <i>U</i> test and Chi-square tests.<br/>Propensity modelling to stratify risk.</p>                                                                                                                                                                                                                                                                                             |  |

|                  |                                                                 |                                                                                                                                                    |                         |                                                                                                                                  |              |                                                                                                                                                                                             |
|------------------|-----------------------------------------------------------------|----------------------------------------------------------------------------------------------------------------------------------------------------|-------------------------|----------------------------------------------------------------------------------------------------------------------------------|--------------|---------------------------------------------------------------------------------------------------------------------------------------------------------------------------------------------|
| Seng et al. 2013 | Singapore General Hospital Spine Outcomes Registry<br>Singapore | To compare midterm clinical and radiological outcomes of minimal invasive surgery (MIS) versus open transforaminal lumbar interbody fusion (TLIF). | Lumbar spinal disorders | PROMs:<br>ODI<br>Neurogenic Symptom Score (NSS)<br>SF36<br>VAS Back pain<br>VAS Leg pain<br>Clinical:<br>Bridwell classification | Not reported | Pearson Chi-square, Students' t-test to compare differences in characteristics. ANOVA to evaluate differences in PROMs. Independent Students' t-test to compare differences between groups. |
|------------------|-----------------------------------------------------------------|----------------------------------------------------------------------------------------------------------------------------------------------------|-------------------------|----------------------------------------------------------------------------------------------------------------------------------|--------------|---------------------------------------------------------------------------------------------------------------------------------------------------------------------------------------------|

<sup>1</sup> PROM Patient-reported outcome measure; ODI Oswestry Disability Index; RMDQ Roland and Morris Disability Questionnaire; NPRS Numeric Pain Rating Scale; VAS Visual Analogue Scale; NASS North American Spine Society lumbar spine outcome scale; COMI Core Outcome Measures Index; SF36, SF 12 Short Form 36 or 12 questions; EQ5D EuroQol 5 Dimensions (including EQ VAS); SAS-22 Scoliosis Research Society 22 questions
